# Supplementary material
Source: publisher site journal article supplement (https://www.dovepress.com/article/580054)
Supplement: Supplementary file 1 [file Supplementary.docx]

**Supplementary1-STROBE checklist-cross sectional**

STROBE Statement—checklist of items that should be included in reports of observational studies

|  | Item No. | Recommendation | Page  No. | Relevant text from manuscript |
| --- | --- | --- | --- | --- |
| **Title and abstract** | 1 | (*a*) Indicate the study’s design with a commonly used term in the title or the abstract | 2 | The purpose of the study and expected clinical outcomes have replaced the results and conclusion in the abstract. |
| (*b*) Provide in the abstract an informative and balanced summary of what was done and what was found | 2 |  |
| Introduction | | | |  |
| Background/rationale | 2 | Explain the scientific background and rationale for the investigation being reported | 3-4 |  |
| Objectives | 3 | State specific objectives, including any prespecified hypotheses | 3-4 |  |
| Methods | | | |  |
| Study design | 4 | Present key elements of study design early in the paper | 4-5 |  |
| Setting | 5 | Describe the setting, locations, and relevant dates, including periods of recruitment, exposure, follow-up, and data collection | 5 |  |
| Participants | 6 | (*a*) *Cohort study*—Give the eligibility criteria, and the sources and methods of selection of participants. Describe methods of follow-up  *Case-control study*—Give the eligibility criteria, and the sources and methods of case ascertainment and control selection. Give the rationale for the choice of cases and controls  *Cross-sectional study*—Give the eligibility criteria, and the sources and methods of selection of participants | 6-8 |  |
| (*b*)*Cohort study*—For matched studies, give matching criteria and number of exposed and unexposed  *Case-control study*—For matched studies, give matching criteria and the number of controls per case |  |  |
| Variables | 7 | Clearly define all outcomes, exposures, predictors, potential confounders, and effect modifiers. Give diagnostic criteria, if applicable |  |  |
| Data sources/ measurement | 8* | For each variable of interest, give sources of data and details of methods of assessment (measurement). Describe comparability of assessment methods if there is more than one group | 10-13 |  |
| Bias | 9 | Describe any efforts to address potential sources of bias | 4-5 |  |
| Study size | 10 | Explain how the study size was arrived at | 9 |  |

| Quantitative variables | 11 | Explain how quantitative variables were handled in the analyses. If applicable, describe which groupings were chosen and why | 13-14 |  |
| --- | --- | --- | --- | --- |
| Statistical methods | 12 | (*a*) Describe all statistical methods, including those used to control for confounding | 13-14 |  |
| (*b*) Describe any methods used to examine subgroups and interactions |  |  |
| (*c*) Explain how missing data were addressed |  |  |
| (*d*) *Cohort study*—If applicable, explain how loss to follow-up was addressed  *Case-control study*—If applicable, explain how matching of cases and controls was addressed  *Cross-sectional study*—If applicable, describe analytical methods taking account of sampling strategy |  |  |
| (*e*) Describe any sensitivity analyses |  |  |
| Results | | | | |
| Participants | 13* | (a) Report numbers of individuals at each stage of study—eg numbers potentially eligible, examined for eligibility, confirmed eligible, included in the study, completing follow-up, and analysed |  | The submitted article is a study protocol for descriptive cross-sectional research, which is why the results will be discussed after the completion of data collection. |
| (b) Give reasons for non-participation at each stage |  |  |
| (c) Consider use of a flow diagram |  |  |
| Descriptive data | 14* | (a) Give characteristics of study participants (eg demographic, clinical, social) and information on exposures and potential confounders |  |  |
| (b) Indicate number of participants with missing data for each variable of interest |  |  |
| (c) *Cohort study*—Summarise follow-up time (eg, average and total amount) |  |  |
| Outcome data | 15* | *Cohort study*—Report numbers of outcome events or summary measures over time |  |  |
| *Case-control study—*Report numbers in each exposure category, or summary measures of exposure |  |  |
| *Cross-sectional study—*Report numbers of outcome events or summary measures |  |  |
| Main results | 16 | (*a*) Give unadjusted estimates and, if applicable, confounder-adjusted estimates and their precision (eg, 95% confidence interval). Make clear which confounders were adjusted for and why they were included |  |  |
| (*b*) Report category boundaries when continuous variables were categorized |  |  |
| (*c*) If relevant, consider translating estimates of relative risk into absolute risk for a meaningful time period |  |  |

| Other analyses | 17 | Report other analyses done—eg analyses of subgroups and interactions, and sensitivity analyses |  |  |
| --- | --- | --- | --- | --- |
| Discussion | | | | |
| Key results | 18 | Summarise key results with reference to study objectives |  | 14 |
| Limitations | 19 | Discuss limitations of the study, taking into account sources of potential bias or imprecision. Discuss both direction and magnitude of any potential bias |  | 16 |
| Interpretation | 20 | Give a cautious overall interpretation of results considering objectives, limitations, multiplicity of analyses, results from similar studies, and other relevant evidence |  | 16 |
| Generalisability | 21 | Discuss the generalisability (external validity) of the study results |  | 14-16 |
| Other information | |  | | |
| Funding | 22 | Give the source of funding and the role of the funders for the present study and, if applicable, for the original study on which the present article is based |  | 2 |

*Give information separately for cases and controls in case-control studies and, if applicable, for exposed and unexposed groups in cohort and cross-sectional studies.

**Note:** An Explanation and Elaboration article discusses each checklist item and gives methodological background and published examples of transparent reporting. The STROBE checklist is best used in conjunction with this article (freely available on the Web sites of PLoS Medicine at http://www.plosmedicine.org/, Annals of Internal Medicine at http://www.annals.org/, and Epidemiology at http://www.epidem.com/). Information on the STROBE Initiative is available at www.strobe-statement.org.

**Supplementary2-SPIRIT 2025 editable checklist**

**SPIRIT 2025 checklist of items to address in a randomized trial protocol***

| **Section / Topic** | **No** | **SPIRIT 2025 checklist item description** | **Reported on page no.** |
| --- | --- | --- | --- |
| **Administrative information** | | |  |
| Title and structured summary | 1a | Title stating the trial design, population, and interventions, with identification as a protocol | Page 1 |
| 1b | Structured summary of trial design and methods, including items from the World Health Organization Trial Registration Data Set | Page 2 |
| Protocol version | 2 | Version date and identifier | NA |
| Roles and responsibilities | 3a | Names, affiliations, and roles of protocol contributors | NA |
| 3b | Name and contact information for the trial sponsor | Page 2-3 |
| 3c | Role of trial sponsor and funders in design, conduct, analysis, and reporting of trial; including any authority over these activities | NA |
| 3d | Composition, roles, and responsibilities of the coordinating site, steering committee, endpoint adjudication committee, data management team, and other individuals or groups overseeing the trial, if applicable | Page 2 |
| **Open science** | | |  |
| Trial registration | 4 | Name of trial registry, identifying number (with URL), and date of registration. If not yet registered, name of intended registry | Page 2 |
| Protocol and statistical analysis plan | 5 | Where the trial protocol and statistical analysis plan can be accessed | Page 2 |
| Data sharing | 6 | Where and how the individual de-identified participant data (including data dictionary), statistical code, and any other materials will be accessible | NA |
| Funding and conflicts of interest | 7a | Sources of funding and other support (e.g., supply of drugs) | Page 2-3 |
| 7b | Financial and other conflicts of interest for principal investigators and steering committee members | Page 3 |
| Dissemination policy | 8 | Plans to communicate trial results to participants, healthcare professionals, the public, and other relevant groups (e.g., reporting in trial registry, plain language summary, publication) | NA |
| **Introduction** | | |  |
| Background and rationale | 9a | Scientific background and rationale, including summary of relevant studies (published and unpublished) examining benefits and harms for each intervention | Page 4 |
| 9b | Explanation for choice of comparator | Page 4-5 |
| Objectives | 10 | Specific objectives related to benefits and harms | Page 5 |
| **Methods: Patient and public involvement, trial design** | | |  |
| Patient and public involvement | 11 | Details of, or plans for, patient or public involvement in the design, conduct, and reporting of the trial | Page 5-6 |
| Trial design | 12 | Description of trial design including type of trial (e.g., parallel group, crossover), allocation ratio, and framework (e.g., superiority, equivalence, non-inferiority, exploratory) | Page 5-6 |
| **Methods: Participants, interventions, and outcomes** | | |  |
| Trial setting | 13 | Settings (e.g., community, hospital) and locations (e.g., countries, sites) where the trial will be conducted | Page 6 |
| Eligibility criteria | 14a | Eligibility criteria for participants | Page 7 |
| 14b | If applicable, eligibility criteria for sites and for individuals who will deliver the interventions (e.g., surgeons, physiotherapists) | Page 6 |
| Intervention and comparator | 15a | Intervention and comparator with sufficient details to allow replication including how, when, and by whom they will be administered. If relevant, where additional materials describing the intervention and comparator (e.g., intervention manual) can be accessed | Page 10-13 |
| 15b | Criteria for discontinuing or modifying allocated intervention/comparator for a trial participant (e.g., drug dose change in response to harms, participant request, or improving/worsening disease) | NA |
| 15c | Strategies to improve adherence to intervention/comparator protocols, if applicable, and any procedures for monitoring adherence (e.g., drug tablet return, sessions attended) | NA |
| 15d | Concomitant care that is permitted or prohibited during the trial | NA |
| Outcomes | 16 | Primary and secondary outcomes, including the specific measurement variable (e.g., systolic blood pressure), analysis metric (e.g., change from baseline, final value, time to event), method of aggregation (e.g., median, proportion), and time point for each outcome | Page 8-9 |
| Harms | 17 | How harms are defined and will be assessed (e.g., systematically, non-systematically) | Page 9-10 |
| Participant timeline | 18 | Time schedule of enrollment, interventions (including any run-ins and washouts), assessments, and visits for participants. A schematic diagram is highly recommended (see Figure) | Page 6 |
| Sample size | 19 | How sample size was determined, including all assumptions supporting the sample size calculation | Page 9 |
| Recruitment | 20 | Strategies for achieving adequate participant enrollment to reach target sample size | Page 9 |
| **Methods: Assignment of interventions** | | |  |
| Randomization: |  |  |  |
| Sequence generation | 21a | Who will generate the random allocation sequence and the method used | NA |
| 21b | Type of randomization (simple or restricted) and details of any factors for stratification. To reduce predictability of a random sequence, other details of any planned restriction (e.g., blocking) should be provided in a separate document that is unavailable to those who enroll participants or assign interventions | NA |
| Allocation concealment  mechanism | 22 | Mechanism used to implement the random allocation sequence (e.g., central computer/telephone; sequentially numbered, opaque, sealed containers), describing any steps to conceal the sequence until interventions are assigned | NA |
| Implementation | 23 | Whether the personnel who will enroll and those who will assign participants to the interventions will have access to the random allocation sequence | NA |
| Blinding | 24a | Who will be blinded after assignment to interventions (e.g., participants, care providers, outcome assessors, data analysts) | Page 10 |
| 24b | If blinded, how blinding will be achieved and description of the similarity of interventions | NA |
| 24c | If blinded, circumstances under which unblinding is permissible, and procedure for revealing a participant’s allocated intervention during the trial | NA |
| **Methods: Data collection, management, and analysis** | | |  |
| Data collection methods | 25a | Plans for assessment and collection of trial data, including any related processes to promote data quality (e.g., duplicate measurements, training of assessors) and a description of trial instruments (e.g., questionnaires, laboratory tests) along with their reliability and validity, if known. Reference to where data collection forms can be accessed, if not in the protocol | Page 10 |
| 25b | Plans to promote participant retention and complete follow-up, including list of any outcome data to be collected for participants who discontinue or deviate from intervention protocols | Page 10 |
| Data management | 26 | Plans for data entry, coding, security, and storage, including any related processes to promote data quality (e.g., double data entry; range checks for data values). Reference to where details of data management procedures can be accessed, if not in the protocol | Page 10 |
| Statistical methods | 27a | Statistical methods used to compare groups for primary and secondary outcomes, including harms | Page 13-14 |
| 27b | Definition of who will be included in each analysis (e.g., all randomized participants), and in which group | NA |
| 27c | How missing data will be handled in the analysis | NA |
| 27d | Methods for any additional analyses (e.g., subgroup and sensitivity analyses) | NA |
| **Methods: Monitoring** | | |  |
| Data monitoring committee | 28a | Composition of data monitoring committee (DMC); summary of its role and reporting structure; statement of whether it is independent from the sponsor and funder; conflicts of interest and reference to where further details about its charter can be found, if not in the protocol. Alternatively, an explanation of why a DMC is not needed | Page 10 |
| 28b | Explanation of any interim analyses and stopping guidelines, including who will have access to these interim results and make the final decision to terminate the trial | NA |
| Trial monitoring | 29 | Frequency and procedures for monitoring trial conduct. If there is no monitoring, give explanation | Page 10-11 |
| **Ethics** | | |  |
| Research ethics approval | 30 | Plans for seeking research ethics committee/institutional review board approval | Page 2 |
| Protocol amendments | 31 | Plans for communicating important protocol modifications to relevant parties | NA |
| Consent or assent | 32a | Who will obtain informed consent or assent from potential trial participants or authorized proxies, and how | Page 2 |
| 32b | Additional consent provisions for collection and use of participant data and biological specimens in ancillary studies, if applicable | NA |
| Confidentiality | 33 | How personal information about potential and enrolled participants will be collected, shared, and maintained in order to protect confidentiality before, during, and after the trial | Page 10 |
| Ancillary and post-trial care | 34 | Provisions, if any, for ancillary and post-trial care, and for compensation to those who suffer harm from trial participation | NA |

*We strongly recommend reading this checklist in conjunction with the SPIRIT 2025 Explanation and Elaboration and the SPIRIT 2025 Expanded Checklist for important clarifications on all the items. We also recommend reading relevant SPIRIT extensions. See [www.consort-spirit.org](http://www.consort-spirit.org)

Citation: Chan A-W, Boutron I, Hopewell S, Moher D, Schulz KF, et al. SPIRIT 2025 statement: updated guideline for protocols of randomised trials. BMJ 2025;389:e081477. <https://dx.doi.org/10.1136/bmj-2024-081477>

© 2025 Chan A-W et al. This is an Open Access article distributed under the terms of the Creative Commons Attribution License (<https://creativecommons.org/licenses/by/4.0/>), which permits unrestricted use, distribution, and reproduction in any medium, provided the original work is properly cited.

**Supplementary3-Ethical protocol**

**Proteomics and Metabolomics-Based Investigation of Local Microenvironmental Changes in Acupoint Sensitization Among Patients with Chronic Atrophic Gastritis: A Cross-Sectional Study Protocol**

**Project leader：Cun-Zhi Liu**

**Undertaker: Beijing University of Chinese Medicine**

**Cooperative Units:**

**Beijing University of Chinese Medicine Dongzhimen Hospital**

**1. Research content**

Study subjects: Patients with chronic atrophic gastritis

Observation indicators: Acupoint tenderness threshold；local microenviron-ment of acupoint

Study type: Cross-sectional study

**2. Protocol**

**2.1 Participants**

**2.1.1** **Diagnostic criteria**

The diagnostic criteria will be established based on the 2021 Expert Consensus on Atrophic Gastritis by the American Gastroenterological Association and the "Chinese Guidelines for the Diagnosis and Treatment of Chronic Gastritis (2022, Shanghai)".

(1) Endoscopic diagnosis: the gastric mucosa appears red and white with a predominance of the white area, and the folds are flattened or even absent; some mucosal blood vessels are exposed, possibly accompanied by mucosal granularity or nodular lesions, or signs of erosion, bleeding, or bile reflux; or other descriptions related to atrophy. Any of these manifestations are sufficient for diagnosis.

(2) Pathological diagnosis: gastric mucosal atrophy or atrophy of the inherent glands; intestinal metaplasia of the gastric mucosa; gastric mucosal dysplasia; or other descriptions related to atrophy. Any of these findings are sufficient for diagnosis.

Note: Patients must meet both gastroscopic and pathological diagnostic criteria.

**2.1.2 Inclusion criteria**

(1) Patients must have an endoscopic and pathological diagnosis report within the last six months meeting the diagnostic criteria for chronic atrophic gastritis, with OLGA staging of III-IV and OLGIM staging of 0-V.

(2) Age between 40-65 years, with no gender restriction.

(3) Difference in pressure pain threshold between the CV12 acupoint and a non-acupoint area greater than 10 N.

(4) Patients must demonstrate good compliance, voluntarily participate in the study, and sign an informed consent form.

Note: Only participants meeting all four criteria are eligible for inclusion in this study.

**2.1.3 Exclusion criteria**

(1) Patients with coexisting autoimmune gastritis (Type A chronic atrophic gastritis), peptic ulcer, gastric ulcer, duodenal ulcer, special types of gastritis, or gastrointestinal bleeding.

(2) Patients with endoscopic or pathological biopsy results indicating cancer, or imaging findings suggesting cancer metastasis.

(3) Patients currently taking analgesics or hormone medications.

(4) Patients with impaired consciousness, inability to express subjective discomfort, or psychiatric disorders.

(5) Patients with severe life-threatening diseases, including serious cardiovascular, cerebrovascular, liver, kidney, hematopoietic disorders, or malignant tumors.

(6) Patients with a propensity for scarring or with scars, injuries, skin diseases, or peripheral nerve disorders at the acupoint sites.

(7) Patients with diseases causing abnormal basal body temperature, such as thyroid dysfunction or other metabolic disorders.

(8) Patients who have undergone gastric surgery or major surgeries resulting in significant organ damage or alteration.

(9) Pregnant or breastfeeding women.

(10) Patients who have received acupuncture or participated in other clinical trials within the past six months.

Note: Participants meeting any of the above criteria will be excluded from this study.

**2.1.4 Suspension criteria**

(1) During the washout period, if the subject develops a cold, fever, or requires medication that affects metabolism, the washout period should be rescheduled.

(2) Occurrence of severe complications or disease deterioration during the washout period.

(3) Occurrence of serious adverse events or situations requiring emergency measures during the sampling period.

(4) Voluntary withdrawal from the clinical study by the subject.

(5) Non-cooperation by the subject, even after explanation by the clinician and research staff.

**2.1.5 Elimination criteria**

(1) Cases mistakenly enrolled that do not meet the inclusion criteria shall be excluded.

(2) Subjects who violate study procedures or fail to comply with precautions during the washout period shall be excluded.

(3) Subjects who meet the inclusion and exclusion criteria but are unable to comply with scheduled sampling or treatment shall be excluded.

(4) If technical problems or equipment failure occur during the blister fluid aspiration and tissue fluid collection process, the affected data may need to be excluded to ensure data quality.

**2.2 Sample size**

This study is exploratory research aimed at detecting differences in pain sensitizing substances in the local tissue fluid between the acupoint sensitization area and the control area. As this is an exploratory study, a formal sample size calculation was not required. A target of 30 pairs of valid samples was determined based on prior experience with similar biomarker studies. As this study does not involve follow-up, there is no dropout rate. Therefore, A total of 30 CAG patients will be recruited, with 60 tissue fluid samples collected in total.

**2.3 Study Grouping**This study is a cross-sectional design, and no patient grouping was performed. A total of 30 patients with chronic atrophic gastritis (CAG) underwent probing and sampling at both the Zhongwan acupoint area and a non-acupoint area. Therefore, randomization was not applicable in this study.

**2.4 Procedure**

**2.4.1 Acupoints & Position**

Acupoints refer to the 2021 National Standard of the People's Republic of China (GB/T 12346-2021) [24] nomenclature and location of acupoints. (Table 1、Figure 1)

**Table 1. Acupoint Position**

| Acupoint | Position |
| --- | --- |
| Zhong Wan (CV12) | Located in the upper abdomen, at the midpoint of the line connecting the xiphoid process and the navel |
| Non-acupoint | In the lateral abdomen, between the 8th intercostal space, 6 cm above LR13 |


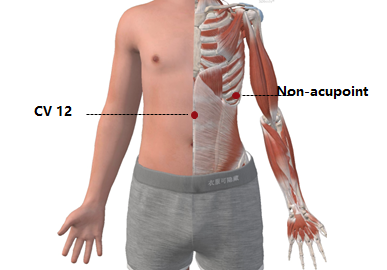

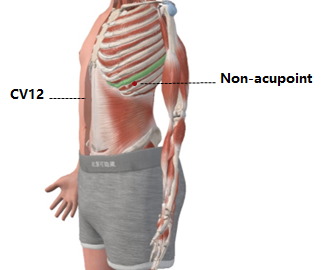


**Figure 1. Acupoint Position**

**2.4.2 Detecting Pain Sensitization**

Participants will lie supine, and trained researchers will use a Wagner FPX50 digital force gauge to detect PPTs on the hand, ensuring they understand the sensation. Measurements will begin with the CV12 acupoint, followed by a non-acupoint area, with two readings taken at each site. If the difference between measurements exceeds 5 N, a third measurement will be performed. The average threshold will be calculated, and acupoint sensitization will be confirmed if the threshold difference exceeds 10 N. Participants meeting this criterion will proceed to blister suction sampling.

**2.4.3 Skin Suction Blisters**

After pain sensitization detection, the sampling area will be disinfected with 2.5% povidone-iodine, followed by de-iodination with 75% alcohol. A sterile three-hole skin suction plate will be applied to the CV12 acupoint or non-acupoint area to create a blister-prone skin area. Negative pressure (40-70 KPa) will be applied for 1-2 hours at 40-50°C using a BFY-IVC epidermal separator. Once blisters form, the negative pressure will be stopped, and fluid will be collected with a sterile syringe into a labeled centrifuge tube. The sampling site will be bandaged afterward. The samples will be collected into four 0.5 ml conical bottom centrifuge tubes, with each sample appropriately labeled and they will be stored at -80°C until further analysis. This storage method allows for direct metabolite extraction and other processing upon thawing, while avoiding repeated freeze-thaw cycles that could potentially affect the analysis results [25].

Note: Throughout the entire procedure, closely monitor the participant's mental state. If any adverse reactions occur, manage them according to the adverse event handling protocol outlined in the study plan.

**2.4.4 Sample Collection and Processing**

Interstitial fluid from the Zhongwan acupoint and a non-acupoint area was collected in 30 CAG patients using the blister fluid aspiration method. Samples were analyzed with high-performance liquid chromatography–tandem mass spectrometry (HPLC-MS/MS) for untargeted metabolomics, proteomics, and targeted metabolite profiling. All analyses were conducted in accredited laboratories with established expertise, ensuring data accuracy and reliability. All biospecimens were securely destroyed after completion of analyses in compliance with national and international biosafety regulations. Data confidentiality was strictly maintained; all datasets were encrypted and anonymized to prevent any linkage to personal identifiers.

**2.4.5 Concomitant Medication**During the one-week washout and sampling periods, patients were allowed to continue regular use of proton pump inhibitors (e.g., esomeprazole). All medication use was documented in detail by the investigators.

**2.5 Observational Indicators and Time Points**

- - 1. **Efficacy Indicators (Primary and Secondary Outcomes)**

(1) Local Microenvironment Differences
Untargeted metabolomics and proteomics of interstitial fluid collected from the Zhongwan acupoint and non-acupoint areas were performed using high-performance liquid chromatography–tandem mass spectrometry (HPLC-MS/MS). Targeted analyses of key metabolites were further conducted to quantify correlations between critical substances and pressure pain threshold.
Time point: Sampling was performed after the washout period (1 week after enrollment).

(2) Pressure Pain Threshold
The pressure pain threshold at the Zhongwan acupoint and non-acupoint areas was measured using the Wagner FPX50 handheld pressure algometer, and differences between the two sites were compared.
Time point: Detection was performed after the washout period (1 week after enrollment).

(3) Diagnostic Indicators
Endoscopy reports, pathological biopsy reports, OLGA staging system, OLGIM staging system, and the updated Sydney System pathological grading.

(4) Symptom Indicators
Symptom assessment of chronic atrophic gastritis using a symptom scoring scale (Likert rating).
Time point: Assessment was performed after the washout period (1 week after enrollment).

(5) General Information
Demographic data (initials, sex, age, height, weight, occupation, trial start/end date, address, contact information); vital signs (temperature, heart rate, respiration, blood pressure); and clinical information (medical history).

**2.5.2 Safety Indicators**Adverse events and adverse reactions: all clinical adverse events during the washout and sampling periods were recorded, including adverse reactions related to blister fluid collection, such as infection, bleeding, and electrolyte imbalance.

**2.6 Adverse events**

Any occurrences of infection or other adverse reactions during blister suction sampling should be documented. If an infection occurs after sampling, gently clean the wound with saline or a specialized wound-cleaning solution, monitor the wound regularly, and, in cases of severe infection, follow medical advice regarding the use of antibiotics and other relevant treatments. If bleeding occurs during or after sampling, stop the vacuum system and apply pressure with a cotton ball to control bleeding. Should localized skin pigmentation or scar hypertrophy develop post-sampling, follow medical recommendations for care. If the patient experiences electrolyte or acid-base imbalances during sampling, regularly monitor their electrolyte and acid-base levels and administer appropriate electrolyte supplementation or medication to correct any imbalances. One week after tissue fluid sampling, all patients will be contacted by phone to check on their condition and ensure their safety.

**2.7 Statistical Analysis**

Statistical analysis will be performed using SPSS 20.0 software. The data will first undergo tests for normality and homogeneity of variance. Normally distributed continuous variables will be described as mean ± standard deviations (M ± SD) and analyzed using independent t-test. Non-normally continuous variables will be represented as medians combined with interquartile ranges（IQR）and analyzed using the Wilcoxon rank-sum test. Categorical data will be analyzed using the chi-squared test and presented as frequencies, percentages, or constituent ratios. For the metabolomics and proteomics data, principal component analysis (PCA) and partial least squares discriminant analysis (PLS-DA) will be employed for pattern recognition and intergroup comparison. Differential metabolites will be identified based on the variable importance in projection (VIP) value, with VIP > 1.0. Additionally, bioinformatics analyses will be conducted, including clustering of differential metabolites and Kyoto Encyclopedia of Genes and Genomes (KEGG) pathway analysis. Correlation analysis will be conducted on the pain thresholds of key substances and the acupoint areas or non-acupoint areas. The specific method will be Pearson correlation or Spearman correlation depending on the situation, and the operation will be carried out using SPSS. A p-value of less than 0.05 will be considered statistically significant.

**2.8 Quality Control**

(1) Subjects were enrolled strictly according to the diagnostic, inclusion, and exclusion criteria.

Personnel performing pressure pain threshold measurements underwent standardized training, including familiarization with the study objectives and requirements, mastery of diagnostic and procedural standards, and correct use of assessment scales.

(2) Clinical trial records and summaries were rigorously maintained. Case report forms (CRFs) were uniformly printed, coded, and registered. All procedures were conducted in strict accordance with the study protocol, and CRFs were completed carefully and objectively, with accurate documentation of any issues arising during the trial.

(3) Blinding was strictly followed: statisticians responsible for data analysis were blinded, and separation between operators and statisticians was ensured.

(4) Participants’ contact information (telephone and address) was recorded, and communication was maintained during the washout period. Patients were fully informed about the study’s purpose and significance and signed written informed consent. Sampling and related examinations were provided free of charge, covered by study funding.

(5) When 10% and 90% of participants had been enrolled, monitors conducted random inspections of study records and data collection. Any issues identified were promptly reported to supervisors, and corrective actions were taken to ensure strict protocol adherence.

**Supplementary4-informed consent**

**Informed Consent Form •Information Sheet**

Dear Sir/Madam,

You are invited to participate in a clinical study entitled “Proteomics and Metabolomics-Based Investigation of Local Microenvironmental Changes in Acupoint Sensitization among Patients with Chronic Atrophic Gastritis.” This study aims to clarify the mechanisms of acupoint sensitization and related local microenvironmental changes.

Before you decide whether to participate, please read the following information carefully. It will help you understand the purpose of the study, the procedures involved, its duration, as well as the potential benefits, risks, and discomforts. You may also discuss this with your family, friends, or your doctor to help you make an informed decision.

**Introduction to the Study**

This is an observational clinical study conducted by Professor Cun-Zhi Liu, Dean of the School of Acupuncture-Moxibustion and Tuina, Beijing University of Chinese Medicine (BUCM), and his research team led by Dr. Yu-Qin Zhang.

The purpose of this study is to investigate acupoint sensitization in patients with chronic atrophic gastritis (CAG) from the perspectives of proteomics and metabolomics. By combining non-targeted screening with targeted quantitative analysis, we will identify key substances (e.g., histamine, Substance P), construct a multi-omics profile of sensitized acupoints, and analyze correlations with pressure pain thresholds.

A total of 30 patients with CAG will be recruited from Dongzhimen Hospital, BUCM. Prior to enrollment, your physician will review eligibility according to inclusion and exclusion criteria, explain the study, and answer your questions. If you agree, you will enter a one-week washout period. Afterward, pressure pain thresholds at abdominal acupoints will be assessed. If you meet sampling criteria, blister suction will be used to collect interstitial fluid from CV12 (Zhongwan) and a non-acupoint control site.

Study duration: approximately 1 week per participant.

Sampling will be performed after the washout period.

Inclusion criteria include: Endoscopic and pathological diagnosis of CAG, Age 40–65 years, Pressure pain threshold difference between CV12 and non-acupoint > 10 N, Voluntary participation with signed informed consent.

Exclusion criteria: autoimmune gastritis, ulcers, cancer, current analgesic or hormonal therapy, severe systemic disease, pregnancy, breastfeeding, recent acupuncture/clinical trial participation, etc.

Sampling procedure: After pain threshold detection, the skin will be disinfected. Negative pressure will be applied with a BFY-IVC epidermal separator to form a bloodless blister. Fluid will be aspirated with a sterile syringe and preserved. Sites will be bandaged to prevent infection and promote healing.

Sample handling: Fluid samples from acupoint and non-acupoint sites will undergo proteomic, metabolomic, and targeted analyses. All samples will be anonymized and securely destroyed after study completion, in compliance with national and international biosafety regulations.

Patients will not be randomized. Each participant serves as their own control (CV12 vs. non-acupoint).

**Study Site and Research Team**

The study will be conducted at Dongzhimen Hospital, BUCM, a top-tier tertiary hospital. The PI is Professor Cun-Zhi Liu. His team has extensive experience in acupuncture clinical trials and mechanism studies, including major national research projects. Participating physicians all hold national licenses in Traditional Chinese Medicine and have more than 5 years of clinical experience.

**Potential Benefits**

For society: Findings may provide new insights into the mechanisms of acupoint sensitization, benefiting future patients with similar conditions.

For participants: After sampling, you may voluntarily receive 1–2 free acupuncture treatments, which may improve gastrointestinal symptoms and quality of life.

**Risks and Discomforts**

During procedures: Mild pain during pressure threshold testing or blister suction; possible minor bleeding, pigmentation, or delayed healing. Strict aseptic precautions will be taken, but infection risk cannot be fully excluded.

Participation burden: Washout and sampling may affect your daily routine or travel.

Optional acupuncture: Usually safe, but mild adverse events such as bruising, dizziness, or soreness may occur.

**Emergency Management**

If severe abdominal pain or other urgent issues occur, the gastroenterology physician may prescribe Esomeprazole (Nexium®) as rescue medication. All medication use will be recorded.

**Alternative Treatments**

Participation is voluntary. Non-participation will not affect your routine medical care. Current treatments for CAG include mucosal protectants, acid inhibitors (H2 blockers, proton pump inhibitors), prokinetics, digestive enzymes, neuromodulators, and Traditional Chinese Medicine formulations.

**Costs and Compensation**

All study-related examinations and sampling are free of charge. Participants will receive 500 RMB compensation after sampling. Costs of managing study-related adverse events will be covered according to national regulations.

**Confidentiality**

All personal information will remain confidential. Only authorized monitors, ethics committees, and regulatory agencies may access medical records to verify data accuracy. Your name will not appear in any publication.

**Participant Rights**

Participation is voluntary. You may withdraw at any time without penalty or loss of benefits. Withdrawal will not affect your medical care. Investigators may also terminate participation if necessary for safety, protocol violations, or study discontinuation.

**Complaints**

If you have concerns or complaints, please contact:

Principal Investigator: Dr. Guang Yang, Tel: 15910605193

Ethics Committee, BUCM: Tel: 010-53911431

**Informed Consent Form • Signature Page**

**Participant Declaration**

I have read and understood the information sheet for this study. The study purpose, procedures, potential benefits, and risks have been explained to me in clear language. I have had the opportunity to ask questions, and all were answered satisfactorily.
I understand that my participation is voluntary, and that I may refuse or withdraw at any time without affecting my medical care or rights. I consent to the study investigators accessing my medical records if required by regulatory authorities.
I will receive a signed copy of this consent form.
Participant (signature): _____________________ Date: ____ / ____ / ____
(or Legal representative signature & relationship): _____________________
Contact number: _____________________

**Investigator Declaration**

I confirm that I have explained the details of this study, including its procedures, risks, and potential benefits, to the participant. All questions have been answered, and the participant has provided informed consent.
Investigator (signature): _____________________ Date: ____ / ____ / ____
Contact number: _____________________
